# Supplementary material for: Determination of Plasma Heparin Level Improves Identification of Systemic Mast Cell Activation Disease
Source: PLoS One. 2015 Apr 24;10(4):e0124912. doi: 10.1371/journal.pone.0124912 (PMC4409380; doi:10.1371/journal.pone.0124912)
Supplement: S1 Table — (XLS) [file pone.0124912.s001.xls]

## Sheet: Tabelle1
Individual results of the determination of the mediators. Increased values are shaded red. The upper inhouse reference values for heparin and tryptase are 0.05 IU/ml and 11.4 µg/l, repectively. Since chromogranin A and N-methylhistamine were determined in various laboratories with different laboratory-specfic reference values, no absolute values are listed but only whether the level of the respec…
Patient´s gender	Diagnosis	Heparin in blood (basal value) [IU/ml]	Heparin in blood after venous occlusion [IU/ml]	Tryptase in blood [µg/l]	Chromogranin A in blood [µg/l]	N-Methylhistamine in urine [µg/g Crea]
female	MCAS	0.13	0.17	7.00	normal	nd
female	MCAS	0	0	4.0	nd	normal
female	MCAS	0.16	0.08	6.60	normal	nd
female	MCAS	0.11	0.19	2.00	normal	nd
female	MCAS	0.02	0.03	17.8	normal	increased
female	MCAS	0	nd	nd	nd	nd
female	MCAS	0.01	0.07	6.36	normal	increased
female	MCAS	0.07	0.10	4.73	normal	nd
female	MCAS	0.02	0.03	3.15	normal	nd
female	MCAS	0.03	0.02	2.37	nd	increased
female	MCAS	0.03	0.02	nd	nd	nd
female	MCAS	nd	nd	20.0	increased	nd
female	MCAS	0.09	0.11	3.65	normal	nd
female	MCAS	0.07	0.09	3.99	normal	normal
female	MCAS	0.11	0.1	6.64	normal	increased
female	MCAS	0.06	0.11	nd	normal	normal
female	MCAS	0.02	0.04	1.64	nd	normal
female	MCAS	0	0.05	< 1	increased	normal
female	MCAS	0.12	0.21	3.80	normal	nd
female	MCAS	0.04	0	7.00	nd	nd
female	MCAS	0	nd	nd	nd	nd
female	MCAS	0.06	nd	4.80	nd	nd
female	MCAS	0	0	3.80	normal	nd
female	MCAS	0	0	4.80	normal	nd
female	MCAS	0.03	0.09	nd	increased	nd
female	MCAS	0.05	0.12	nd	nd	nd
female	MCAS	0	0	4.00	nd	increased
female	MCAS	0.05	0.05	7.40	nd	normal
female	MCAS	0	0.01	1.68	normal	normal
female	MCAS	0.01	0.03	3.09	normal	normal
female	MCAS	0	nd	nd	nd	normal
female	MCAS	0	0	5.84	normal	normal
female	MCAS	0.11	0.14	nd	nd	nd
female	MCAS	0.07	0.07	3.07	normal	normal
female	MCAS	0	nd	3.0	nd	normal
female	MCAS	0.11	0.16	4.87	normal	normal
female	MCAS	0.12	0.15	4.38	normal	normal
female	MCAS	0.14	nd	2.60	nd	nd
female	MCAS	nd	nd	54.0	nd	nd
female	MCAS	0	nd	nd	nd	nd
female	MCAS	0.13	0.17	6.65	increased	normal
female	MCAS	0	nd	nd	nd	nd
female	MCAS	0.06	0.1	nd	increased	nd
female	MCAS	0.05	0.09	nd	nd	nd
female	MCAS	0.04	0.05	44.2	normal	increased
female	MCAS	0.02	0.05	6.70	normal	nd
female	MCAS	0.04	0.08	1.38	nd	nd
female	MCAS	0.01	0.03	5.60	normal	nd
female	MCAS	0.08	0.1	3.64	normal	normal
female	MCAS	0.04	0.07	12.0	normal	nd
female	MCAS	nd	nd	14.0	nd	nd
female	MCAS	0.03	0.06	1.99	normal	normal
female	MCAS	0	0	3.62	nd	nd
female	MCAS	0.08	0.13	7.47	normal	normal
female	MCAS	0	0.03	3.53	normal	normal
female	MCAS	0	0	nd	nd	nd
female	MCAS	0.11	0.13	1.92	normal	normal
female	MCAS	0.11	0.16	2.70	normal	nd
female	MCAS	0	0.01	< 1.00	nd	increased
female	MCAS	0.07	0.05	6.0	nd	nd
female	MCAS	0	0	4.0	nd	normal
female	MCAS	0.06	0.05	5.67	normal	nd
female	MCAS	0.12	0.19	4.50	normal	nd
female	MCAS	0	0.01	4.80	normal	nd
female	MCAS	0	0	2.18	nd	nd
female	MCAS	0.04	0.1	7.84	normal	normal
female	MCAS	0.03	0.05	2.81	normal	normal
female	MCAS	0.06	0.11	4.90	normal	nd
female	MCAS	0.1	0.1	3.90	normal	nd
female	MCAS	0.05	0.06	3.72	normal	normal
female	MCAS	0.04	0.06	1.0	normal	normal
female	MCAS	0.06	0.06	1.68	normal	nd
female	MCAS	0.02	0.09	12.30	normal	normal
female	MCAS	0.03	0.03	4.80	normal	normal
female	MCAS	0.04	0.06	1.0	normal	normal
female	MCAS	0	0	2.52	normal	normal
female	MCAS	0	nd	nd	nd	nd
female	MCAS	0.07	0.09	3.21	normal	normal
female	MCAS	0.05	0.08	1.34	normal	normal
female	MCAS	0.13	0.15	24.00	nd	nd
female	MCAS	0.16	0.17	<11	nd	nd
female	MCAS	0.06	0.07	nd	nd	nd
female	MCAS	0	0	nd	nd	nd
female	MCAS	0.02	0.04	1.86	normal	normal
female	MCAS	nd	nd	2.0	increased	nd
female	MCAS	0.04	0.06	13.60	nd	normal
female	MCAS	0	nd	4.12	nd	nd
female	MCAS	0.02	0.04	3.06	normal	normal
female	MCAS	0.13	0.18	7.80	increased	nd
female	MCAS	0.03	0.07	3.0	nd	nd
female	MCAS	0.12	0.12	4.28	normal	normal
female	MCAS	0.03	0.09	3.70	increased	increased
female	MCAS	0	0	nd	nd	nd
female	MCAS	0.04	0.05	2.99	normal	normal
female	MCAS	0	0.03	3.50	normal	normal
female	MCAS	0.02	0.02	1.95	normal	normal
female	MCAS	0	0	15.60	normal	normal
female	MCAS	0.02	0.03	23.00	normal	increased
female	MCAS	0	nd	3.66	nd	nd
female	MCAS	0	0	nd	nd	increased
female	MCAS	0.02	0.06	2.87	normal	normal
female	MCAS	0.04	0.04	4.33	normal	normal
female	MCAS	0.04	0.07	12.80	normal	nd
female	MCAS	0	0	nd	nd	nd
female	MCAS	0.06	0.05	1.0	normal	increased
female	MCAS	0.05	0.12	3.73	normal	normal
female	MCAS	0.09	0.11	12.60	nd	nd
female	MCAS	0.04	0.03	nd	nd	normal
female	MCAS	0.01	nd	5.40	nd	normal
female	MCAS	0.01	nd	nd	nd	nd
female	MCAS	0.04	0.06	3.34	normal	nd
female	MCAS	0.10	0.04	5.3	normal	nd
female	MCAS	0.02	0.02	3.91	normal	normal
female	MCAS	0.08	0.10	4.10	normal	normal
female	MCAS	0.32	0.48	17.00	nd	nd
female	MCAS	0.02	0.08	2.34	normal	normal
female	MCAS	0.09	0.11	2.48	normal	increased
female	MCAS	0.05	0.10	7.38	normal	normal
female	MCAS	0.01	0.02	1.75	increased	normal
female	MCAS	0	0	nd	nd	nd
female	MCAS	0.05	0.06	nd	normal	nd
female	MCAS	0.09	0.09	2.00	normal	normal
female	MCAS	0.01	0.04	2.95	normal	normal
female	MCAS	0.17	0.21	nd	nd	nd
female	MCAS	0.08	0.11	2.50	normal	normal
female	MCAS	0	0	2.10	normal	nd
female	MCAS	0.09	0.12	5.67	normal	normal
female	MCAS	0.06	0.08	1.54	increased	normal
female	MCAS	0	0.04	4.36	increased	normal
female	MCAS	0.08	0.10	1.49	normal	normal
female	MCAS	0	nd	nd	nd	nd
female	MCAS	0.07	0.10	2.90	normal	normal
female	MCAS	0	nd	nd	nd	nd
female	MCAS	0.06	0.07	3.80	increased	normal
female	MCAS	0.11	0.08	3.30	normal	nd
female	MCAS	0.06	0.07	4.79	normal	increased
female	MCAS	0.06	0.06	1.62	normal	normal
female	MCAS	0.08	0.13	nd	nd	nd
female	MCAS	0.03	0.03	7.70	normal	normal
female	MCAS	0	0.07	3.36	normal	increased
female	MCAS	0	0.01	1.20	normal	normal
female	MCAS	0.04	0.15	8.10	nd	increased
female	MCAS	0.07	0.08	4.00	nd	normal
female	MCAS	0	0.01	3.80	normal	normal
female	MCAS	0.03	0.11	1.0	nd	increased
female	MCAS	0.07	0.11	nd	nd	nd
female	MCAS	0	0	nd	nd	nd
female	MCAS	0.07	0.11	18.00	normal	normal
female	MCAS	0	0.03	6.40	nd	increased
female	MCAS	0.05	0.07	4.67	nd	normal
female	MCAS	0.03	0.07	5.40	nd	normal
female	MCAS	0.09	0.16	nd	nd	nd
female	MCAS	0.07	0.09	3.48	normal	normal
female	MCAS	0.07	0.09	3.61	nd	normal
female	MCAS	0.13	0.14	2.71	normal	normal
female	MCAS	0.02	0.05	3.27	normal	normal
female	MCAS	0	0.02	2.53	normal	normal
female	MCAS	0.05	0.06	nd	nd	nd
female	MCAS	nd	nd	35.30	increased	nd
female	MCAS	0.05	0.09	1.77	normal	nd
female	MCAS	0	0	nd	nd	nd
female	MCAS	nd	nd	1.90	normal	normal
female	MCAS	0.18	0.20	20.0	normal	nd
female	MCAS	0	0	5.60	nd	increased
female	MCAS	0.01	0.05	11.30	nd	normal
female	MCAS	0.09	0.12	2.30	normal	normal
female	MCAS	0	0	nd	nd	nd
female	MCAS	0	nd	13.0	normal	normal
female	MCAS	nd	nd	3.0	normal	normal
female	MCAS	0.05	0.06	7.10	increased	nd
female	MCAS	0.23	0.23	5.70	normal	nd
female	MCAS	0.03	0.06	14.10	nd	normal
female	MCAS	0.06	0.08	3.54	normal	normal
female	MCAS	0.05	0.09	nd	nd	increased
female	MCAS	0.05	0.03	3.94	normal	normal
female	MCAS	0.04	0.05	5.0	nd	nd
female	MCAS	0.05	0.06	2.26	normal	nd
female	MCAS	0	0	5.95	normal	nd
female	MCAS	0.11	0.14	3.00	normal	normal
female	MCAS	0	0.03	9.40	normal	normal
female	MCAS	0.06	0.08	6.44	normal	normal
female	MCAS	0.12	0.12	nd	nd	normal
female	MCAS	0.04	0.06	6.16	normal	normal
female	MCAS	0.06	0.07	5.45	normal	normal
female	MCAS	0.07	0.10	12.90	normal	nd
female	MCAS	0.06	0.07	3.69	increased	normal
male	MCAS	0.09	0.08	nd	nd	nd
male	MCAS	0.09	0.12	nd	nd	nd
male	MCAS	0.06	0.07	7.16	normal	normal
male	MCAS	nd	nd	30.80	normal	nd
male	MCAS	0.08	0.09	2.42	normal	normal
male	MCAS	nd	nd	143.0	normal	increased
male	MCAS	0.09	0.13	5.01	nd	normal
male	MCAS	0.11	0.14	3.02	nd	normal
male	MCAS	0	0	5.70	normal	increased
male	MCAS	0.01	0.02	4.00	nd	normal
male	MCAS	0.12	0.15	3.00	nd	increased
male	MCAS	0.04	0.02	4.60	nd	increased
male	MCAS	0.04	0.05	2.64	normal	normal
male	MCAS	0.05	0.09	8.30	normal	normal
male	MCAS	0	0	nd	nd	nd
male	MCAS	0	nd	2.94	nd	nd
male	MCAS	0.09	0.10	3.85	normal	normal
male	MCAS	0	0	4.00	increased	increased
male	MCAS	0.11	0.11	1.94	normal	increased
male	MCAS	0.04	0.11	11.80	nd	increased
male	MCAS	0.08	0.11	nd	normal	increased
male	MCAS	0	nd	6.00	nd	nd
male	MCAS	0.25	0.27	3.90	normal	normal
male	MCAS	0	0	2.50	nd	nd
male	MCAS	0.13	0.15	16.10	increased	normal
male	MCAS	0.04	0.04	nd	nd	nd
male	MCAS	0.25	0.33	2.10	normal	nd
male	MCAS	0.02	nd	2.70	normal	increased
male	MCAS	0	nd	nd	nd	increased
male	MCAS	0.08	0.09	3.31	normal	normal
male	MCAS	0.05	0.06	6.08	normal	normal
male	MCAS	nd	nd	4.80	normal	normal
male	MCAS	0.07	0.08	nd	nd	nd
male	MCAS	0.08	nd	5.70	nd	nd
male	MCAS	0.09	0.11	3.44	normal	normal
male	MCAS	0.06	0.12	3.07	increased	normal
male	MCAS	0.12	0.15	2.24	normal	normal
male	MCAS	0	0	27.0	nd	nd
male	MCAS	0.02	0.01	nd	nd	nd
male	MCAS	0	0	nd	nd	nd
male	MCAS	0.07	0.09	2.05	normal	normal
male	MCAS	0.08	0.09	8.08	normal	normal
male	MCAS	0.08	0.05	13.0	normal	increased
male	MCAS	0.06	0.11	4.56	normal	normal
male	MCAS	0	nd	4.0	nd	normal
male	MCAS	0.08	0.11	10.40	nd	nd
male	MCAS	0.06	0.07	4.06	normal	normal
male	MCAS	0.07	0.12	3.99	normal	normal
male	MCAS	0.09	0.13	nd	nd	nd
male	MCAS	0.15	0.32	6.84	nd	nd
male	MCAS	0.02	0.07	7.45	normal	increased
male	MCAS	0	0.01	5.0	normal	normal
female	SM	nd	nd	4.90	increased	nd
female	SM	0	0.01	73.00	nd	nd
female	SM	0.06	0.05	1.40	increased	nd
female	SM	nd	nd	10.50	nd	nd
female	SM	nd	nd	4.63	normal	normal
female	SM	0.08	0.06	15.00	nd	nd
female	SM	0	0	50.1	nd	increased
female	SM	0.01	nd	8.40	increased	nd
female	SM	0	0	27.00	nd	nd
female	SM	0	0	24.00	nd	nd
female	SM	0.03	0.03	17.50	nd	nd
female	SM	0	nd	>200	nd	nd
female	SM	0.06	0.11	3.30	increased	normal
male	SM	0.04	0.06	124.00	nd	increased
male	SM	0.05	0.08	40.7	normal	increased
male	SM	0.04	0.1	10.10	nd	normal
male	SM	0.04	0.03	15.80	increased	nd
male	SM	nd	nd	135.00	nd	nd
male	SM	0.11	0.11	24.70	normal	normal
